# Supplementary material for: Significance of Catecholamine Biosynthetic/Metabolic Pathway in SARS-CoV-2 Infection and COVID-19 Severity
Source: MDPI journal article supplement (doi:10.3390/cells12010012), 2022-12-20
Supplement: s1 [file s1]

# Supplementary Data

## Significance of Catecholamine biosynthetic/metabolic pathway in SARS-CoV-2 infection and COVID-19 severity

George Mpekoulis <sup>1</sup>, Katerina I. Kalliampakou<sup>1</sup>, Rafaela S. Milona<sup>1</sup>, Despoina Lagou<sup>1</sup>, Anastasios Ioannidis<sup>2</sup>, Edison Jajaj<sup>3</sup>, Christos T. Chasapis<sup>4</sup>, Dionysios Kefallinos<sup>5</sup>, Ioannis Karakasiliotis<sup>6</sup>, Anastasia Kotanidou<sup>3</sup>, Stylianos Chatzipanagiotou<sup>7</sup>, Dido Vassilacopoulou<sup>8</sup>, Alice G. Vassiliou<sup>3,#</sup>, Emmanouil Angelakis<sup>9,10,#</sup>, Niki Vassilaki<sup>1,\*</sup>

**Citation:** Mpekoulis, G.; Kalliampakou, K.I.; Milona, R.S.; Lagou, D.; Ioannidis, A.; Jajaj, E.; Chasapis, C.T.; Kefallinos, D.; Karakasiliotis, I.; Kotanidou, A.; et al. Significance of Catecholamine Biosynthetic/Metabolic Pathway in SARS-CoV-2 Infection and COVID-19 Severity. *Cells* **2023**, *12*, 12. <https://doi.org/10.3390/cells12010012>

Academic Editors: Mara Biasin and Fiona Limanaqi

Received: 7 November 2022

Revised: 11 December 2022

Accepted: 13 December 2022

Published: 20 December 2022

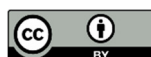

**Copyright:** © 2022 by the authors. Licensee MDPI, Basel, Switzerland. This article is an open access article distributed under the terms and conditions of the Creative Commons Attribution (CC BY) license (<https://creativecommons.org/licenses/by/4.0/>).

- <sup>1</sup> Laboratory of Molecular Virology, Hellenic Pasteur Institute, Athens 11521, Greece
- <sup>2</sup> Department of Nursing, University of Peloponnese, Sparta 23100, Greece
- <sup>3</sup> First Department of Critical Care Medicine & Pulmonary Services, GP Livanos and M Simou Laboratories, National and Kapodistrian University of Athens Medical School, Evangelismos Hospital, Athens 10676, Greece
- <sup>4</sup> Institute of Chemical Biology, National Hellenic Research Foundation, 11635 Athens, Greece
- <sup>5</sup> School of Electrical Engineering and Computer Science, National Technical University of Athens, 9 Iroon Polytechniou Street, Zografou, Athens 15773, Greece
- <sup>6</sup> Laboratory of Biology, Department of Medicine, Democritus University of Thrace, Alexandroupolis 68100, Greece
- <sup>7</sup> Department of Medical Biopathology, Medical School, University of Athens, Eginition Hospital, Athens 11528, Greece
- <sup>8</sup> Section of Biochemistry and Molecular Biology, Faculty of Biology, National and Kapodistrian University of Athens, Athens 15772, Greece
- <sup>9</sup> Department of Diagnostics, Hellenic Pasteur Institute, Athens 11521, Greece
- <sup>10</sup> Aix Marseille Univ, IRD, IHU Méditerranée Infection, VITROME, Marseille 13005, France
- # Equal contribution
- \* Corresponding author: [nikiv@pasteur.gr](mailto:nikiv@pasteur.gr) (N.V.)

### Supplementary Tables

**Table S1.** Mean values of the studied genes' expression in nasopharyngeal tissue of SARS-CoV-2 positive or negative subjects.

| Characteristics                   | Negative      | SARS-CoV-2    |                |
|-----------------------------------|---------------|---------------|----------------|
|                                   |               | Mild- CoV-2   | Severe-CoV-2   |
| <i>DDC</i> (2 <sup>ΔΔCt</sup> )   | 0.004 ± 0.002 | 0.033 ± 0.019 | 0.002 ± 0.0015 |
| <i>ACE2</i> (2 <sup>ΔΔCt</sup> )  | 0.005 ± 0.003 | 0.008 ± 0.005 | 0.001 ± 0.002  |
| <i>dACE2</i> (2 <sup>ΔΔCt</sup> ) | 0.008 ± 0.003 | 0.023 ± 0.008 | 0.021 ± 0.008  |
| <i>ISG56</i> (2 <sup>ΔΔCt</sup> ) | 0.561 ± 0.225 | 1.414 ± 1.014 | 0.668 ± 0.318  |
| <i>EPO</i> (2 <sup>ΔΔCt</sup> )   | 0.011 ± 0.004 | 0.027 ± 0.011 | 0.027 ± 0.013  |

\*The 2<sup>ΔΔCt</sup> mean value for each gene was used to evaluate the fold-differences between the studied groups.

**Table S2.** Demographic data of individuals whose blood samples were used.

| Characteristics            | Healthy    | ICU/CoV-2  | ICU/non-CoV-2 | p-value             |
|----------------------------|------------|------------|---------------|---------------------|
| <b>Total number</b>        | n=35       | n=32       | n=30          |                     |
| <b>Median age in years</b> |            |            |               |                     |
| <b>(IQR)</b>               | 49 (42-55) | 57 (62-70) | 57 (35 - 73)  | 0.0024 <sup>a</sup> |
| <b>Sex</b>                 |            |            |               |                     |
| <b>Male</b>                | 20 (57.2%) | 25 (78.1%) | 17 (78.1%)    | 0.1437 <sup>b</sup> |
| <b>Female</b>              | 15 (42.8%) | 7 (21.9%)  | 13 (21.9%)    |                     |

<sup>a</sup>: p-value was calculated with Kruskal-Wallis test, followed by Dunn's test.

<sup>b</sup>: p-value was calculated with Chi-square test.

**Table S3.** Mean values of the studied genes expression in whole blood samples of SARS-CoV-2 positive or negative subjects.

| SARS-CoV-2 (Blood samples)        |           |               |                |               |
|-----------------------------------|-----------|---------------|----------------|---------------|
| Characteristics                   |           | Healthy       | ICU/CoV-2      | Ward/CoV-2    |
| <b>Gene expression</b>            |           |               |                |               |
| <i>DDC</i> (2 <sup>ΔΔCt</sup> )   | Mean ± SD | 1.876 ± 0.964 | 0.538 ± 0.265  | 0.246 ± 0.243 |
| <i>dACE2</i> (2 <sup>ΔΔCt</sup> ) | Mean ± SD | 0.134 ± 0.066 | 0.041 ± 0.0301 | 0.017 ± 0.02  |
| <i>ISG56</i> (2 <sup>ΔΔCt</sup> ) | Mean ± SD | 0.704 ± 0.499 | 0.206 ± 0.127  | 0.438 ± 0.411 |
| <i>MAOA</i> (2 <sup>ΔΔCt</sup> )  | Mean ± SD | 0.028 ± 0.026 | 0.427 ± 0.315  | 0.102 ± 0.126 |
| <i>MAOB</i> (2 <sup>ΔΔCt</sup> )  | Mean ± SD | 0.007 ± 0.006 | 0.072 ± 0.053  | 0.072 ± 0.049 |
| <i>DBH</i> (2 <sup>ΔΔCt</sup> )   | Mean ± SD | 0.038 ± 0.025 | 0.041 ± 0.036  | 0.049 ± 0.054 |
| <i>EPO</i> (2 <sup>ΔΔCt</sup> )   | Mean ± SD | 0.688 ± 0.498 | 0.059 ± 0.053  | 0.023 ± 0.037 |

\*The 2<sup>ΔΔCt</sup> mean value for each gene was used to evaluate the fold-differences between the studied groups.

## Supplementary Figures

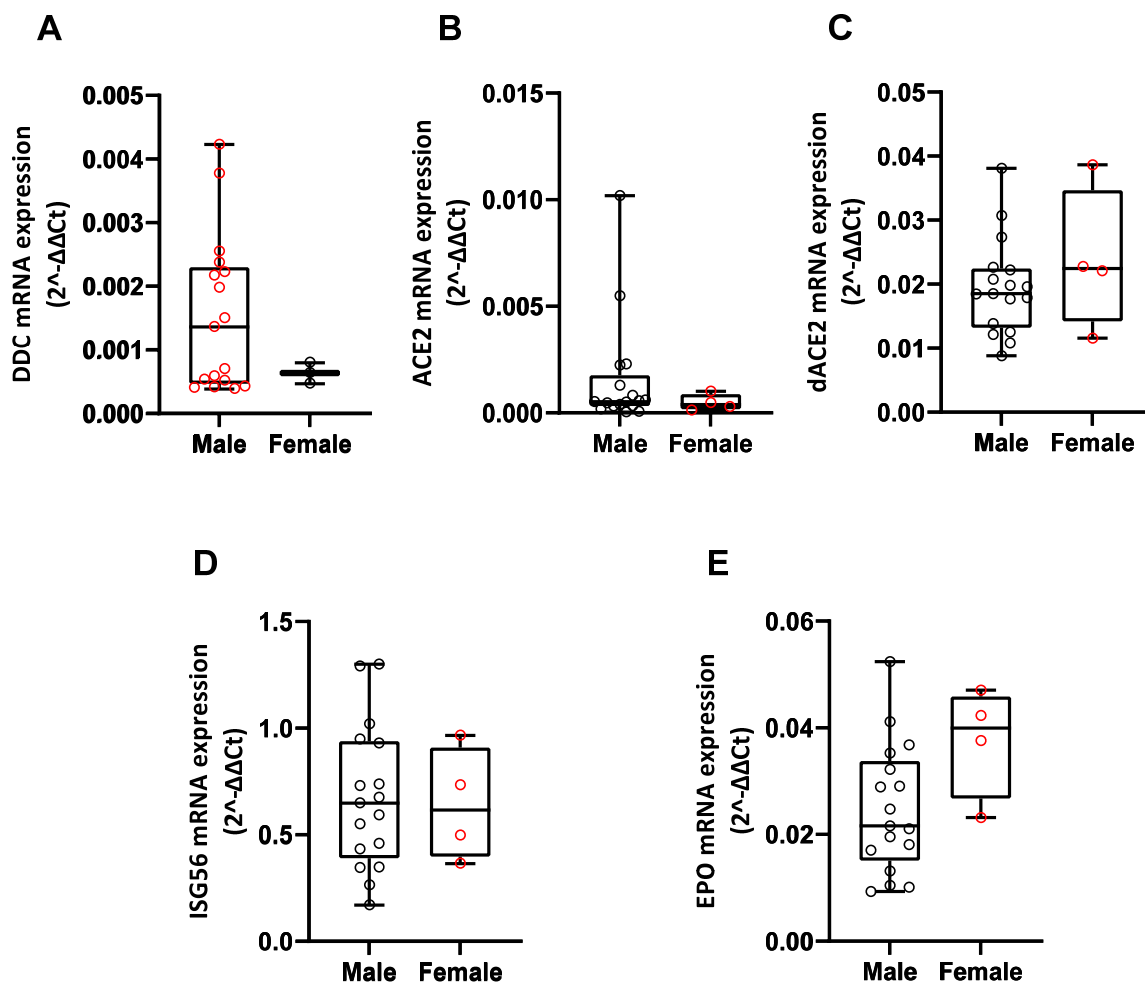

**Figure S1.** Comparison of DDC (A), ACE2 (B), dACE2 (C), ISG56 (D), or EPO (E) expression in the nasopharyngeal swab samples of COVID-19 patients between men and women. Data are displayed as box plots and dots; the line in the middle corresponds to the median value; box edges, 25<sup>th</sup> to 75<sup>th</sup> centiles; whiskers, range of values. p-values were calculated with the Mann-Whitney U test.

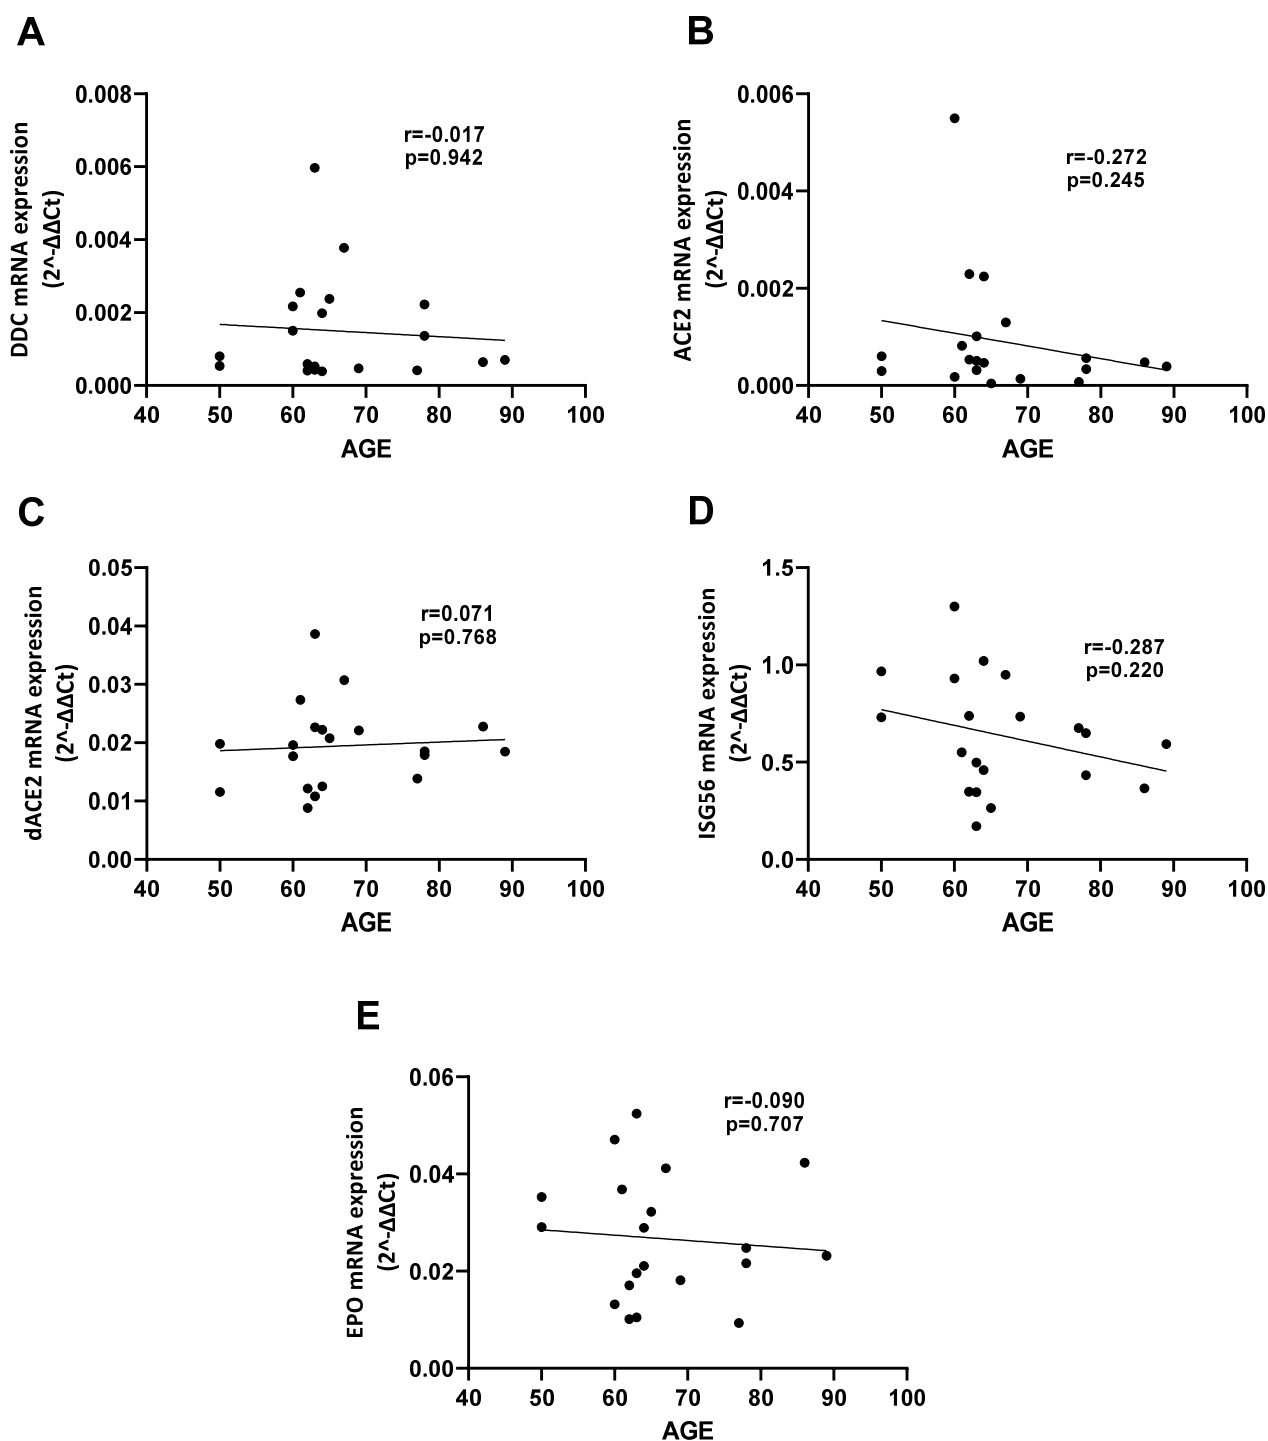

**Figure S2.** Correlation among the expression of *DDC* (A), *ACE2* (B), *dACE2* (C), *ISG56* (D), or *EPO* (E) with patients' age (continuous parameter) in nasopharyngeal swab samples of COVID-19 patients with severe symptoms. Data are presented as XY scatter plot with fitted linear regression lines. Pearson's or Spearman's correlation coefficient (r) and p-values (p) were calculated.

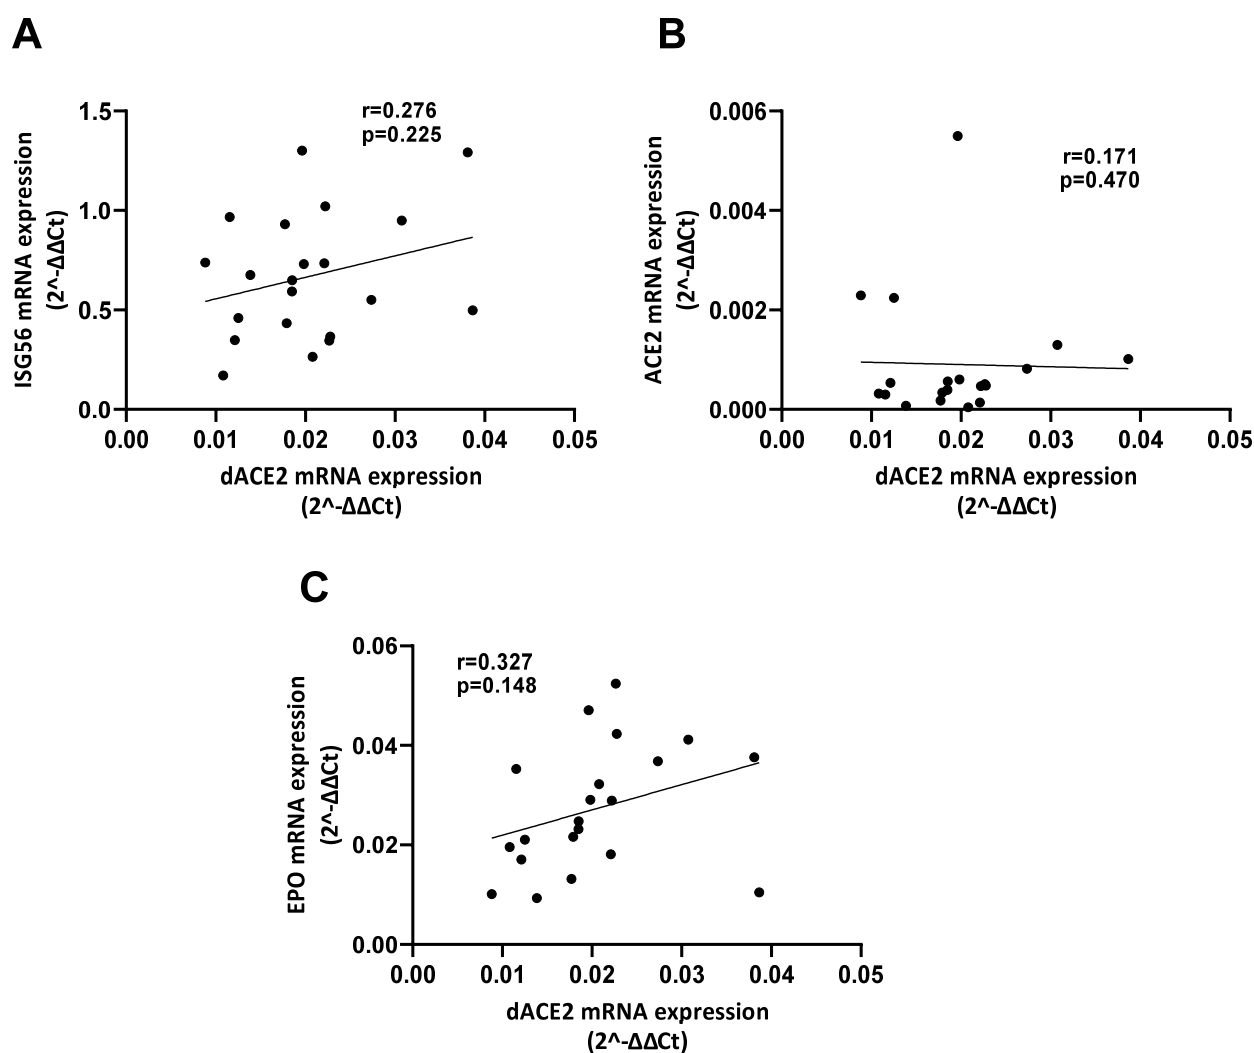

**Figure S3.** Correlation among the expression of *ISG56* (A), *ACE2* (B), or *EPO* (C), with that of *dACE2* in the nasopharyngeal swab samples of COVID-19 patients with severe symptoms. Data are presented as XY scatter plot with fitted linear regression lines. Pearson's or Spearman's correlation coefficient ( $r$ ) and  $p$ -values ( $p$ ) were calculated.

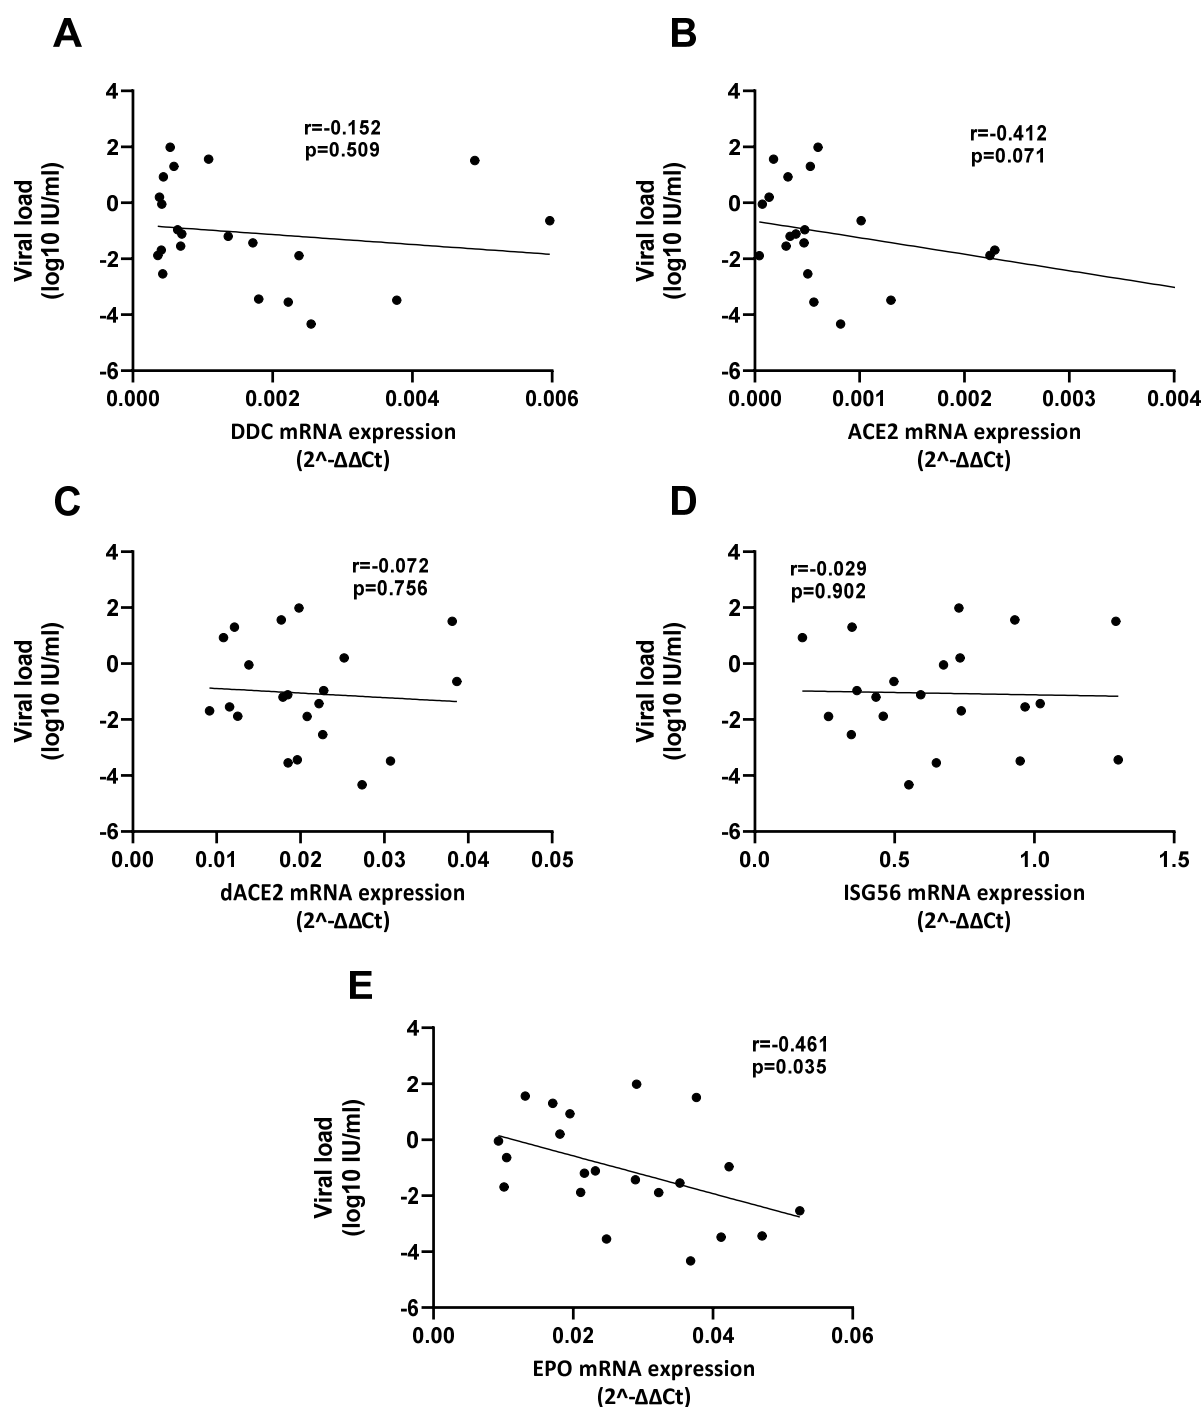

**Figure S4.** Correlation among the expression of *DDC* (A), *ACE2* (B), *dACE2* (C), *ISG56* (D), or *EPO* (E) with SARS-CoV-2 viral titers in the nasopharyngeal tissue of severe COVID-19 cases. Data are presented as XY scatter plot with fitted linear regression lines. Pearson's or Spearman's correlation coefficient ( $r$ ) and  $p$ -values ( $p$ ) were calculated.

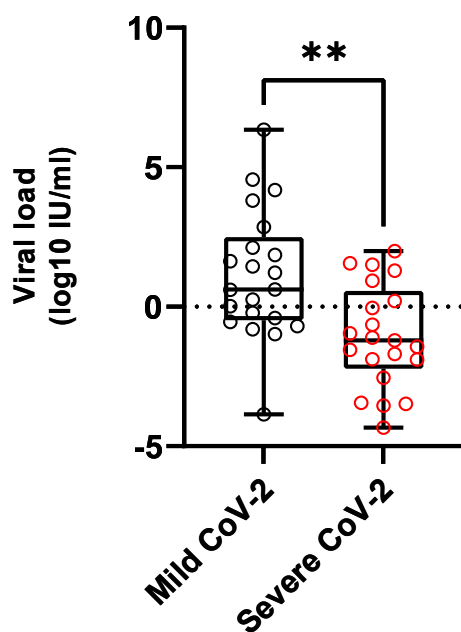

**Figure S5.** Comparison of SARS-CoV-2 viral load levels between COVID-19 patients with mild or no symptoms with more severe cases. Data are displayed as box plots and dots; the line in the middle corresponds to the median value; box edges, 25<sup>th</sup> to 75<sup>th</sup> centiles; whiskers, range of values. p-values were calculated with the unpaired t-test. \*\* p=0.0014.

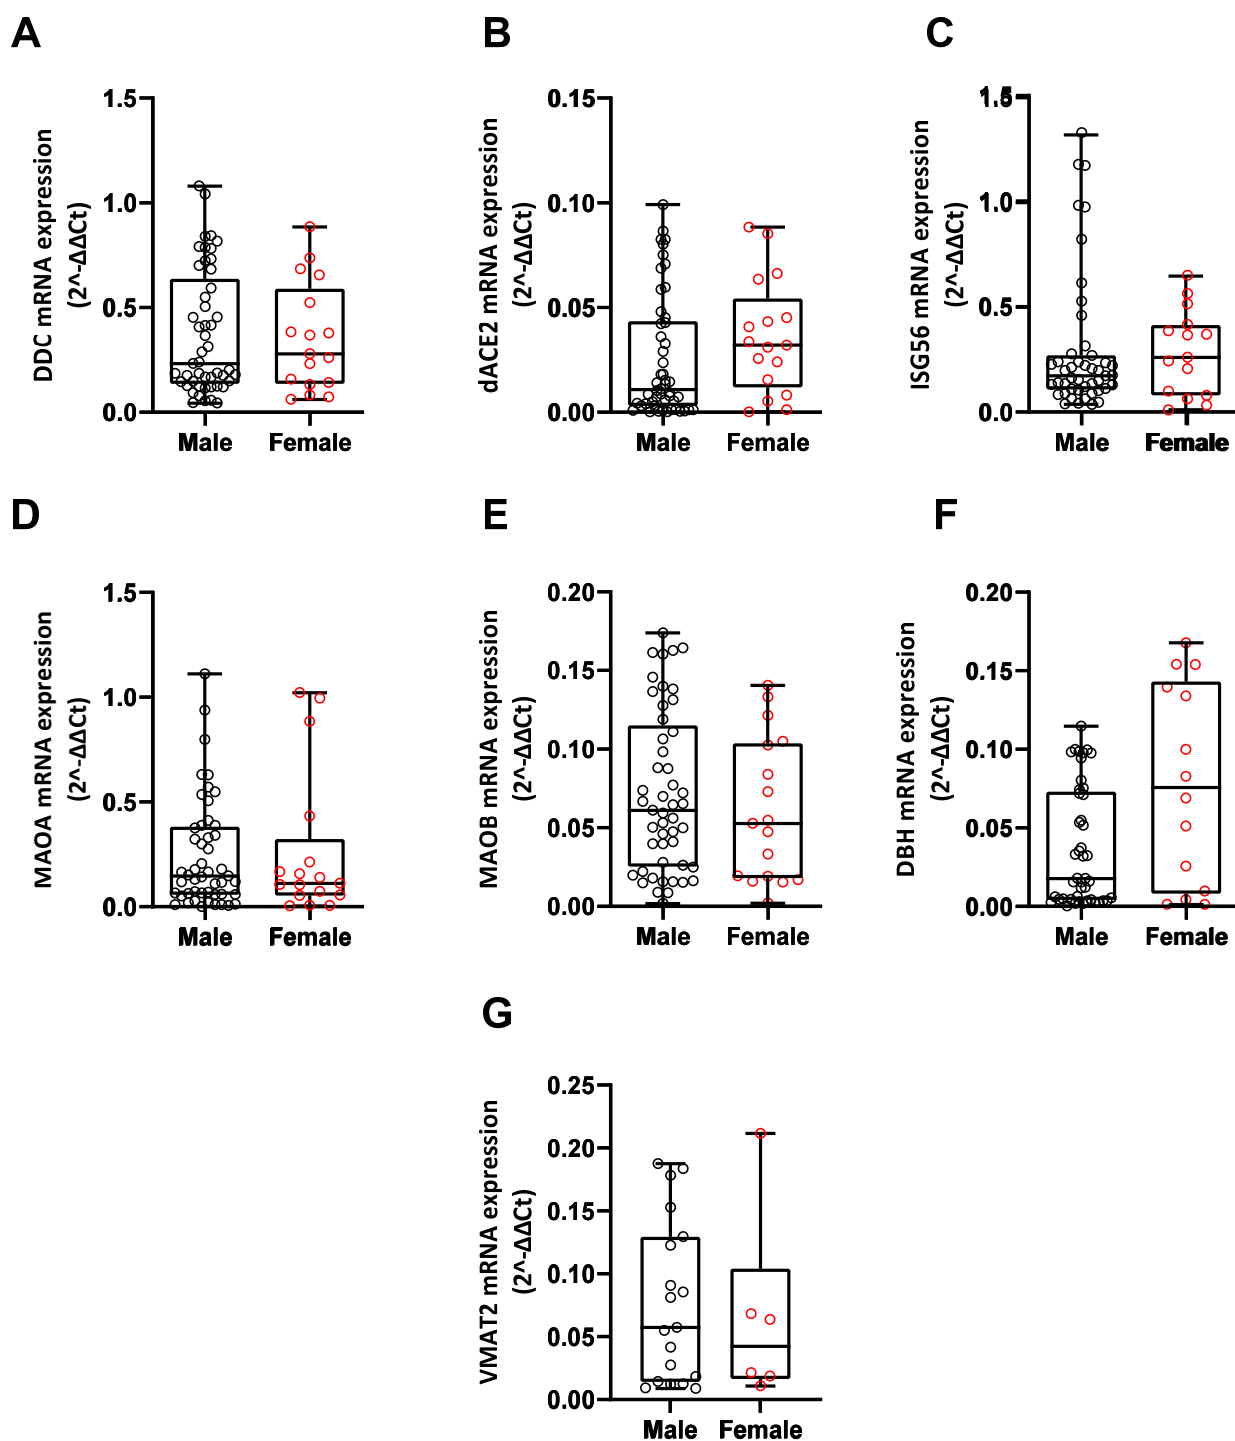

**Figure S6.** Comparison of DDC (A), dACE2 (B), ISG56 (C), MAOA (D), MAOB (E), DBH (F), or VMAT2 (G) expression between men and women, in whole samples of COVID-19 patients with severe symptoms. Data are displayed as box plots and dots; the line in the middle corresponds to the median value; box edges, 25<sup>th</sup> to 75<sup>th</sup> centiles; whiskers, range of values. p-values were calculated with the Mann-Whitney U test.



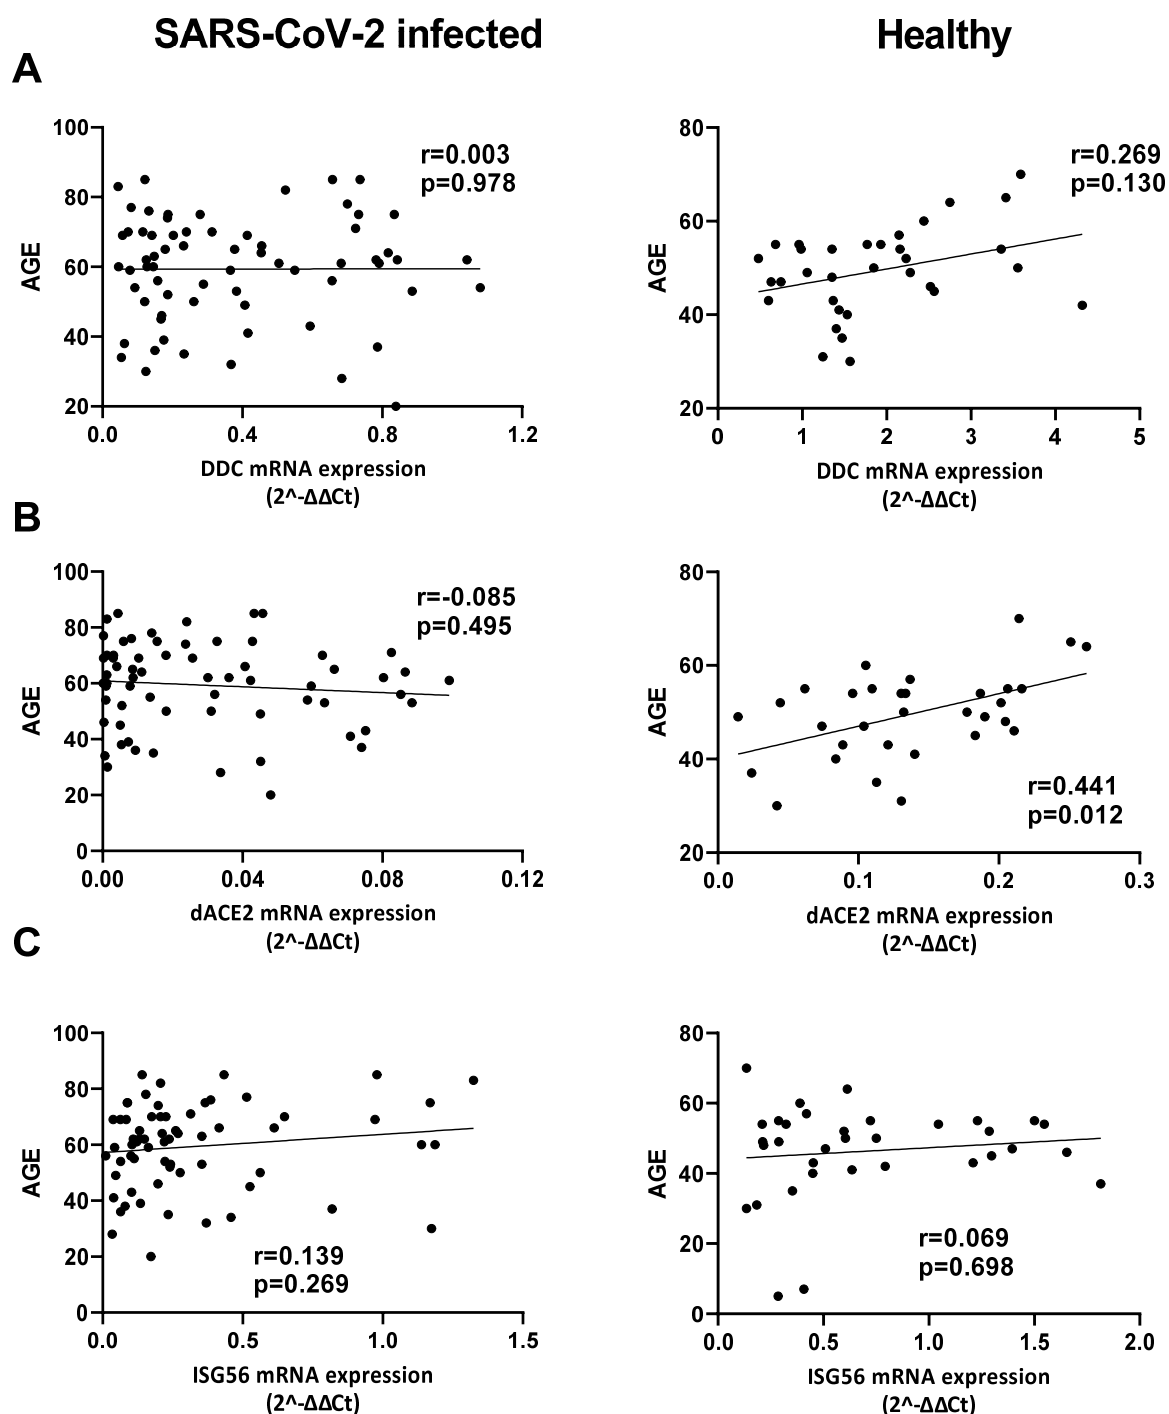

**Figure S7.** XY scatter plot with fitted linear regression lines of DDC (A), dACE2 (B), or ISG56 (C) expression versus age (continuous parameter) in whole blood samples of COVID-19 patients with severe symptoms (Left panels) or healthy individuals (Right panels). Pearson's or Spearman's correlation coefficient (r) and p-values (p) were calculated.

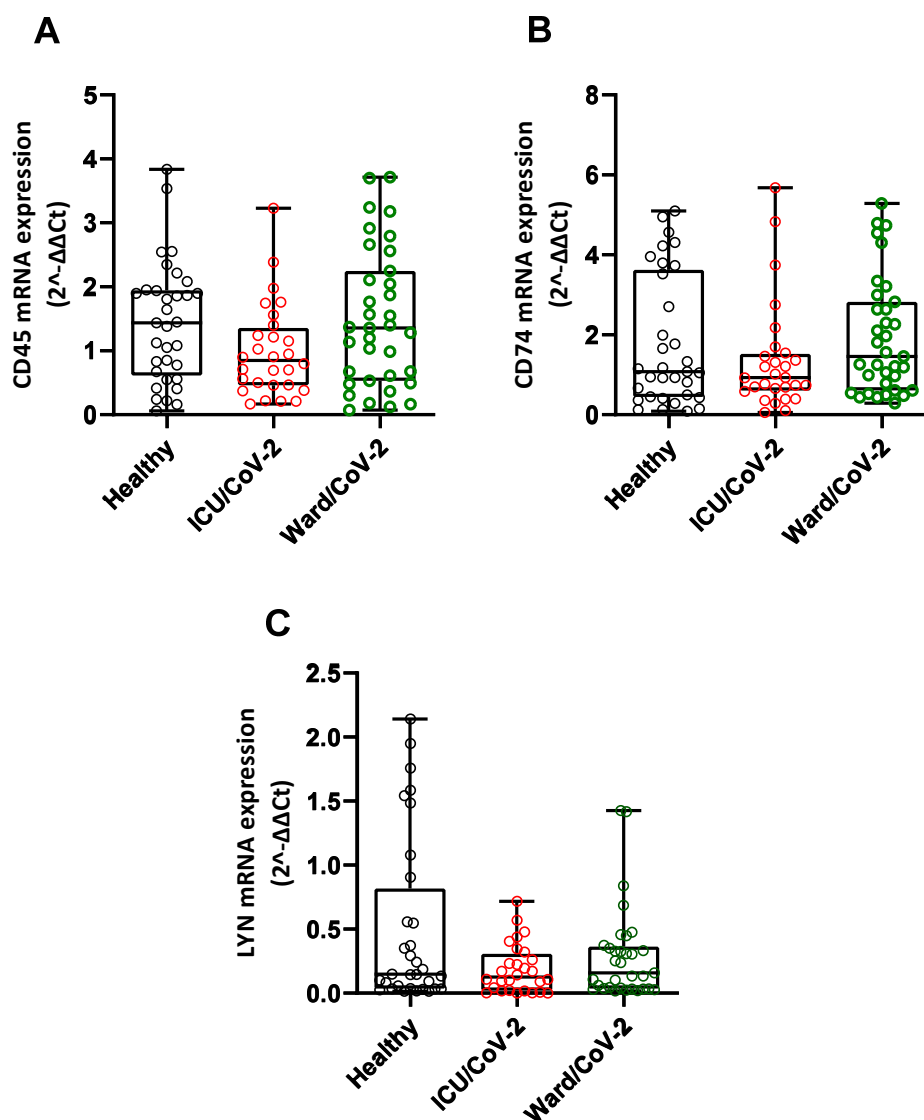

**Figure S8.** Box plot analysis comparing the mRNA expression of *CD45* (A), *CD74* (B) and *LYN* (C) in whole blood samples among Healthy individuals and COVID-19 hospitalized patients (ICU/CoV-2, Ward/CoV-2 groups). Data are presented as box plots and dots, line in the middle corresponds for the median; box edges, 25<sup>th</sup> to 75<sup>th</sup> centiles; whiskers, range of values. p-values were determined with the non-parametric Kruskal-Wallis test. Multiple comparisons among the studied groups were performed with Dunn's test.

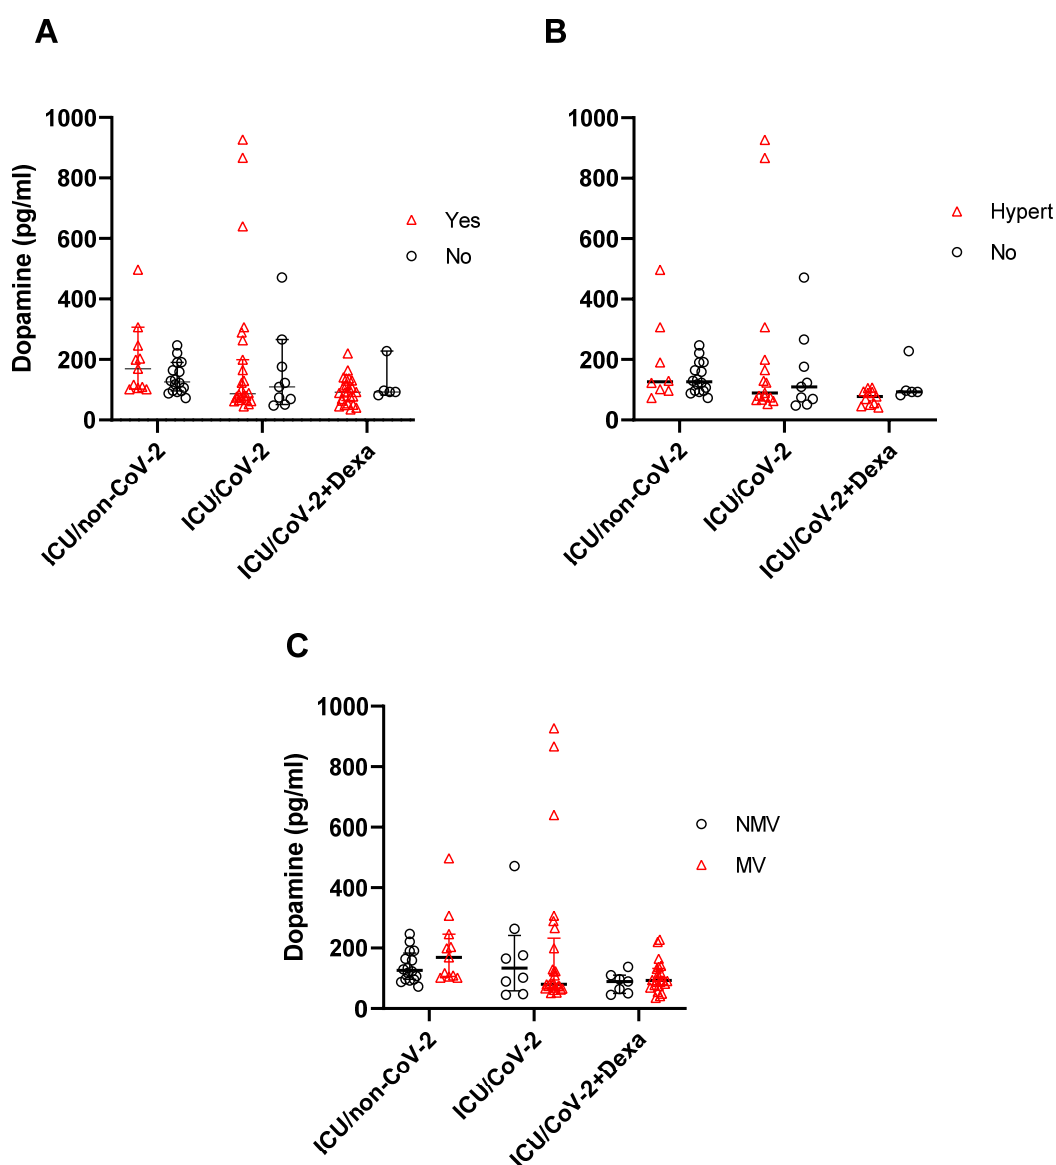

**Figure S9.** Serum dopamine levels of SARS-CoV-2 infected subjects in the presence of comorbidities. **(A)** Absolute dopamine levels in the serum of ICU COVID-19 (receiving DEXA or not) or ICU non-COVID-19 patients, with (Yes) or without (No) comorbidities. **(B)** Absolute dopamine levels in the same patient cohorts, with (Hypert) or without (No) hypertension. **(C)** Effect of mechanical ventilation on dopamine levels of the aforementioned patient groups. p-values were determined with Two-Way ANOVA.

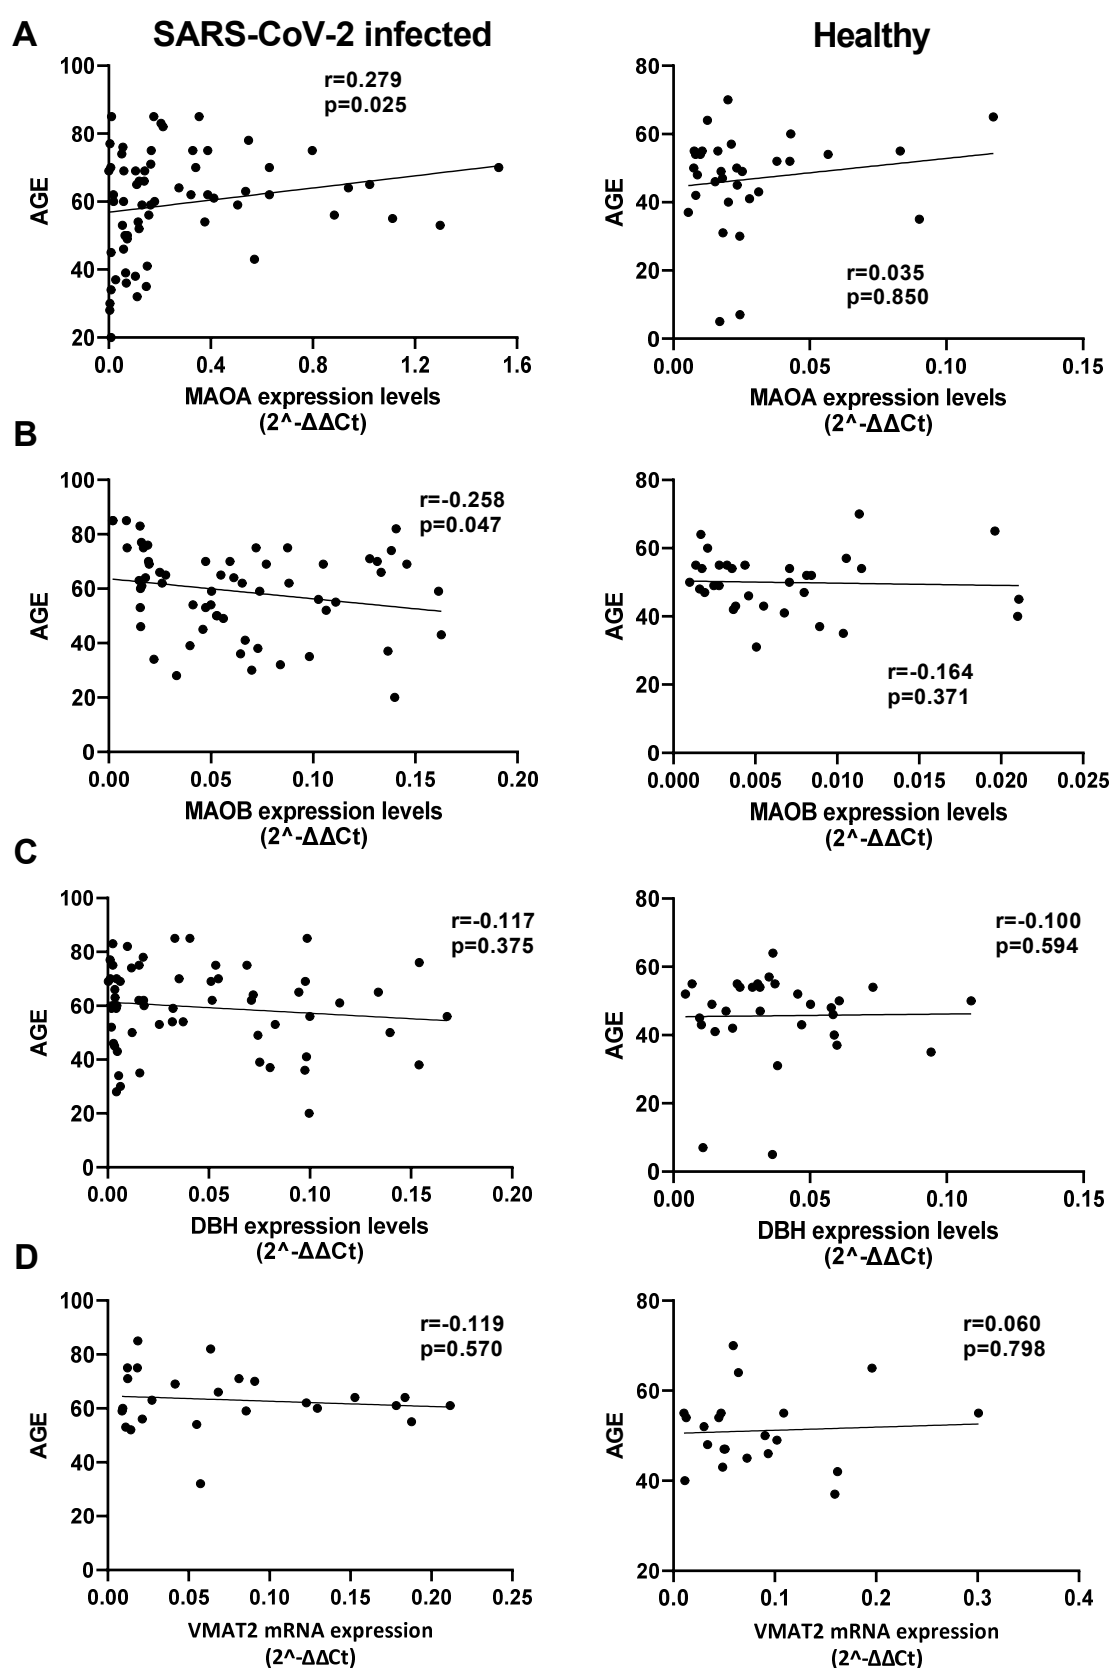

**Figure S10.** XY scatter plot with fitted linear regression lines of MAOA (A), MAOB (B), DBH (C), or VMAT2 (D) expression versus age (continuous parameter) in whole samples of COVID-19 patients with severe symptoms (Left panels) or healthy individuals (Right panels). Pearson's or Spearman's correlation coefficient (r) and p-values (p) were calculated.

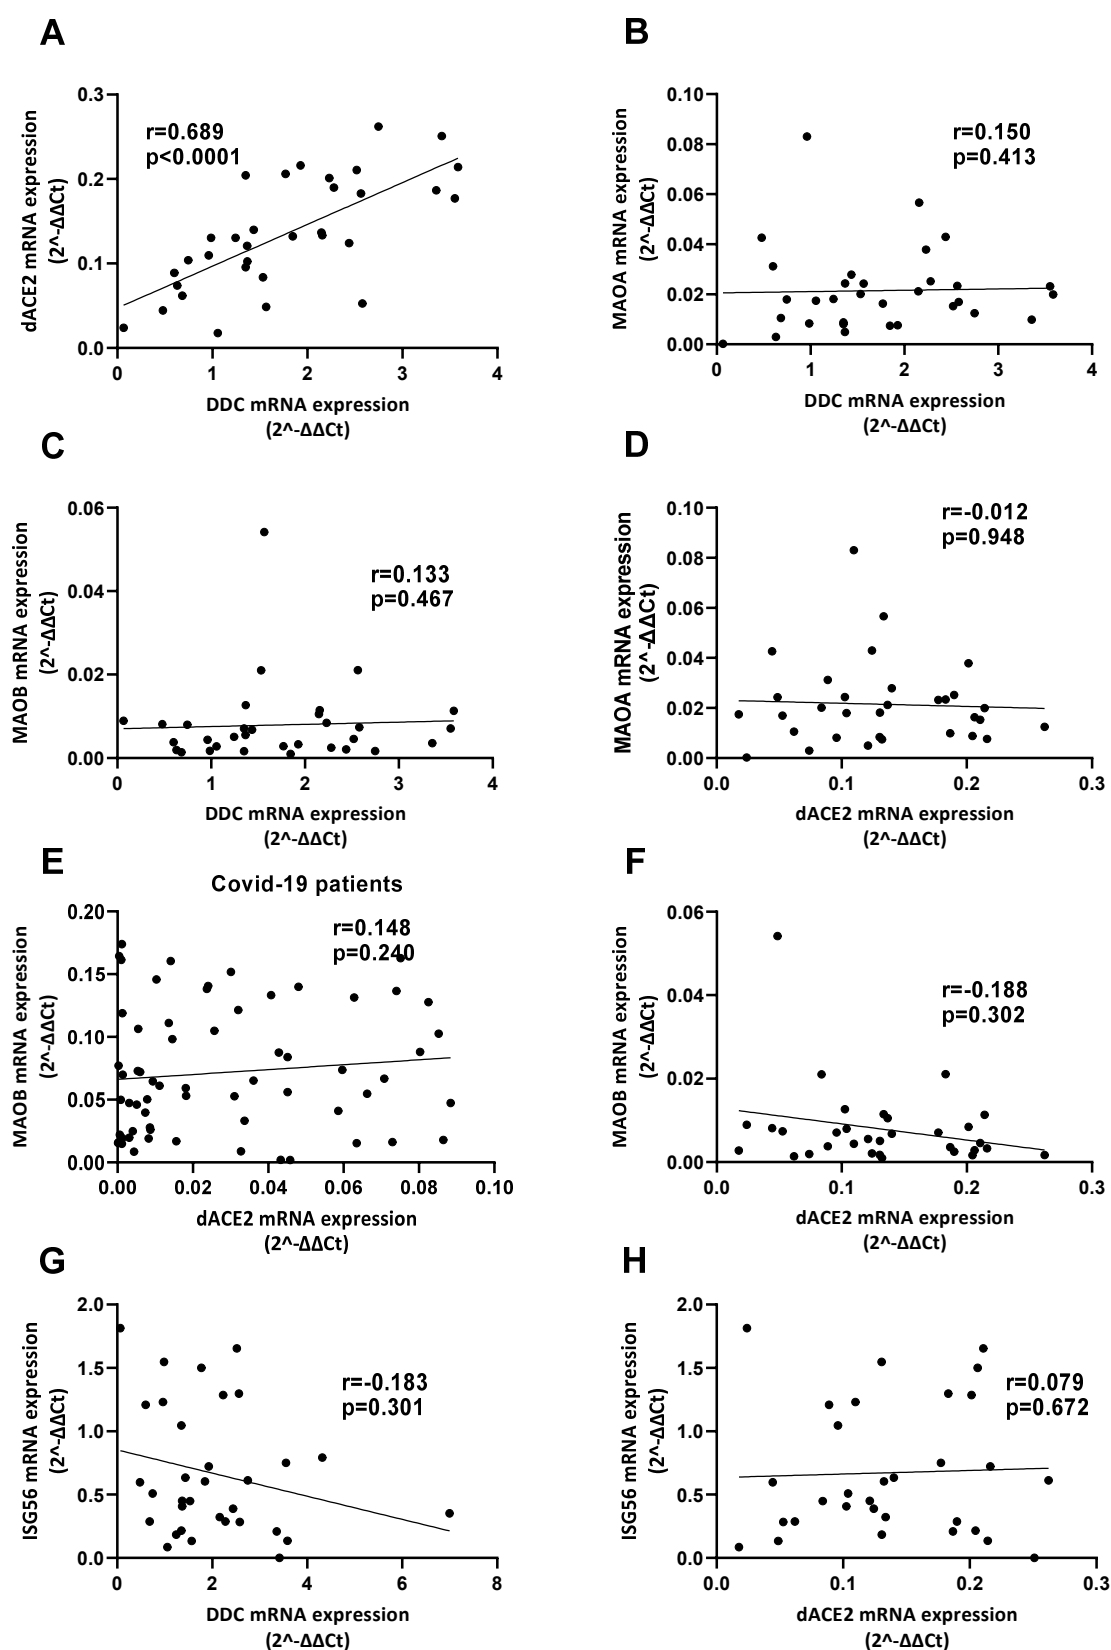

**Figure S11.** Correlation of the expression of all studied genes in the blood of COVID-19 severe cases and healthy individuals. (A–C) Correlation among the expression of *dACE2* (A), *MAOA* (B), or *MAOB* (C), with that of *DDC* in the whole blood samples of healthy individuals. (D–F) Correlation among the expression of *MAOA* and *MAOB* with that of *dACE2* in whole blood samples of COVID-19 patients with severe symptoms (E), or healthy individuals (D,F). (G,H) Correlation among the expression of *DDC* or *dACE2* with that

of *ISG56* in the blood of healthy individuals. Data are presented as XY scatter plot with fitted linear regression lines. Pearson's or Spearman's correlation coefficient ( $r$ ) and  $p$ -values ( $p$ ) were calculated.

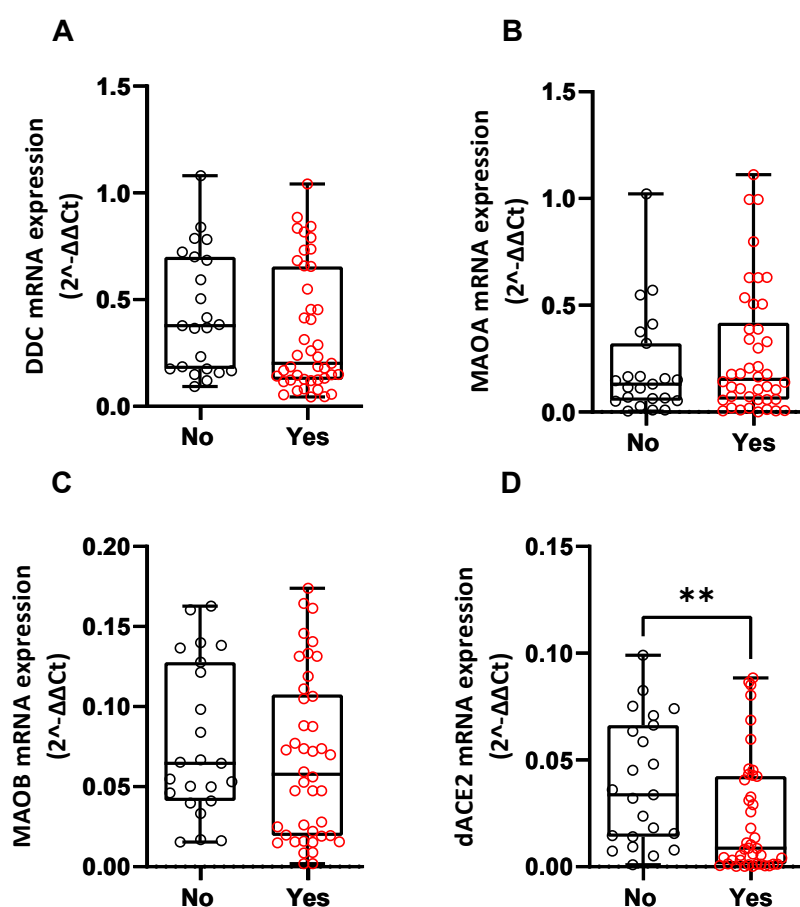

**Figure S12.** Box plot analysis of the mRNA expression of *DDC* (A), *MAOA* (B), *MAOB* (C) and *dACE2* (D) in whole blood samples among the hospitalized COVID-19 patients, in the presence (Yes) or absence (No) of comorbidities. Each patient's mRNA expression value is represented as a dot; line in the middle, median; box edges, 25<sup>th</sup> to 75<sup>th</sup> centiles; whiskers, range of values.  $p$ -values were calculated using the non-parametric Mann-Whitney U test. \*\* $p$  < 0.01.

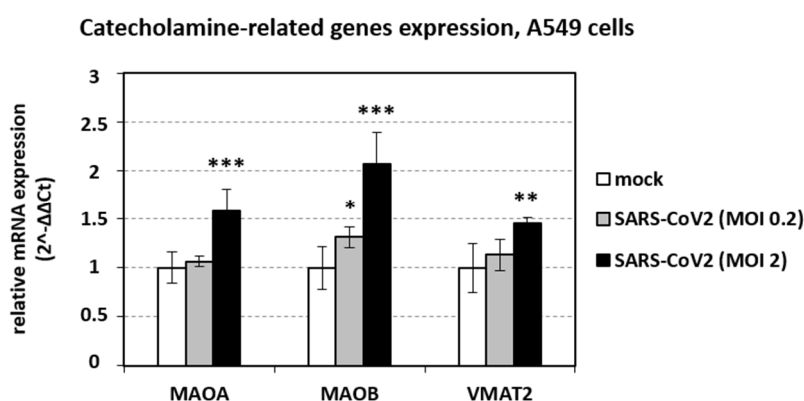

**Figure S13.** SARS-CoV-2 infection of A549 cells upregulated the expression of *MAOA*, *MAOB*, and *VMAT2* 24 hours post-infection. Further analysis of data derived from the RNA-sequencing Skyline database ([http://rstats.immgen.org/Skyline\\_COVID-19/skyline.html](http://rstats.immgen.org/Skyline_COVID-19/skyline.html)) [67]. \*  $p$  < 0.05, \*\*  $p$  < 0.01, \*\*\*  $p$  < 0.0001 vs mock.  $p$  values were calculated with Student's  $t$ -test.

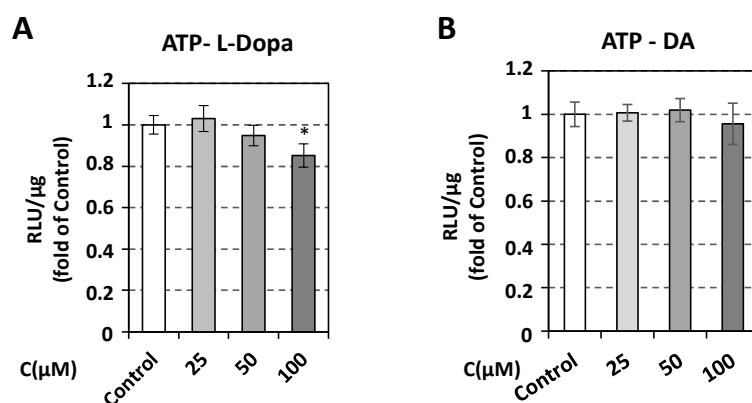

**Figure S14.** Effect of DDC substrate (L-Dopa, A) and product (dopamine, B) on intracellular ATP levels. VeroE6 cells were inoculated with the indicated concentrations of (A) L-Dopa, (B) DA, or were mock-treated (Control) for 72 h. A chemiluminescence-based assay was performed to determine the intracellular ATP levels, which were expressed as RLU/μg of total protein amount. Values derived from the Control cells were set to one. Bars represent mean values from three independent experiments in triplicates. Error bars indicate standard deviations. \* $p < 0.05$  vs Control.
